# Supplementary material
Source: publisher site journal article supplement (https://www.dovepress.com/article/541090)
Supplement: Supplementary file 1 [file Re-Supplementary%20Table%20and%20Figure%2525255B541090%2525255D_1.docx]

**Supplementary Table S1. Univariable Cox Regression Analysis of Variables for the Primary Endpoint.**

| **Variables** | **B** | **SE** | **Wald** | **HR** | **95% CI** | ***P*** |
| --- | --- | --- | --- | --- | --- | --- |
| **Age (years)** | 0 | 0.006 | 0.002 | 1 | 0.987–1.012 | 0.96 |
| **Gender (n,%)** | 0.068 | 0.224 | 0.092 | 1.07 | 0.690–1.659 | 0.761 |
| Male |  |  |  |  |  |  |
| Female |  |  |  |  |  |  |
| **Hospitalization day(d)** | -0.127 | 0.038 | 11.332 | 0.88 | 0.817–0.948 | 0.001a |
| **HR (bpm)** | 0.017 | 0.007 | 6.121 | 1.017 | 1.003–1.030 | 0.013a |
| **SBP (mmHg)** | -0.008 | 0.005 | 2.679 | 0.992 | 0.984–1.001 | 0.102 |
| **DBP (mmHg)** | -0.015 | 0.007 | 4.853 | 0.985 | 0.972–0.998 | 0.028a |
| **Medical history (n,%)** |  |  |  |  |  |  |
| Hypertension | 0.307 | 0.207 | 2.197 | 1.36 | 0.906–2.041 | 0.138 |
| Diabetes mellitus | 0.586 | 0.298 | 3.869 | 1.796 | 1.002–3.220 | 0.049a |
| Stroke or TIA | 0.631 | 0.392 | 2.586 | 1.879 | 0.871–4.053 | 0.108 |
| Previous MI/PCI/CABG | 0.818 | 0.459 | 3.178 | 2.267 | 0.922–5.574 | 0.075 |
| Heart failure | -0.119 | 0.586 | 0.041 | 0.887 | 0.281–2.801 | 0.839 |
| **Coronary heart disease** | 0.08 | 0.35 | 0.052 | 1.083 | 0.546–2.150 | 0.819 |
| **Current smoking status** | -0.311 | 0.204 | 2.319 | 0.733 | 0.491–1.093 | 0.128 |
| **Current drinking status** | -0.192 | 0.246 | 0.606 | 0.826 | 0.510–1.338 | 0.436 |
| **Medications during hospitalisation (n,%)** |  |  |  |  |  |  |
| Aspirin | - | - | - | - | - | - |
| P2Y12 receptor inhibitors | - | - | - | - | - | - |
| ACEIs or ARBs | -0.302 | 0.208 | 2.102 | 0.739 | 0.491–1.112 | 0.147 |
| CCBs | -0.657 | 0.214 | 9.429 | 0.519 | 0.341–0.789 | 0.002a |
| Statins |  |  |  |  |  |  |
| β-blockers | -0.732 | 0.421 | 3.018 | 0.481 | 0.211–1.098 | 0.082 |
| Diuretics | 0.276 | 0.206 | 1.801 | 1.318 | 0.881–1.971 | 0.18 |
| **Killip class (n,%)** |  |  |  |  |  |  |
| Killip class (1-2) | -0.082 | 0.35 | 0.055 | 0.921 | 0.464–1.829 | 0.815 |
| Killip class (3-4) | 0.082 | 0.35 | 0.055 | 1.085 | 0.547–2.154 | 0.815 |
| **Target Vessel (n,%)** |  |  |  |  |  |  |
| LM | 0.615 | 0.714 | 0.741 | 1.85 | 0.456–7.503 | 0.389 |
| LAD | -1.14 | 0.242 | 22.142 | 0.32 | 0.199–0.514 | <0.001a |
| LCX | 1.768 | 0.511 | 11.99 | 5.859 | 2.154–15.936 | 0.001a |
| RCA | 0.449 | 0.256 | 3.086 | 1.567 | 0.949–2.585 | 0.079 |
| **Simultaneous treatment of vascular situations (n,%)** | 0.277 | 0.586 | 0.223 | 1.319 | 0.418–4.164 | 0.636 |
| 1 |  |  |  |  |  |  |
| >1 |  |  |  |  |  |  |
| **Vessel-disease (stenosis >50%) (n,%)** | 0.467 | 0.202 | 5.342 | 1.595 | 1.074–2.371 | 0.021a |
| 1 |  |  |  |  |  |  |
| >1 |  |  |  |  |  |  |
| **IVUS assit (n,%)** | 0.323 | 0.586 | 0.304 | 1.381 | 0.438–4.360 | 0.582 |
| Yes |  |  |  |  |  |  |
| No |  |  |  |  |  |  |
| **Number of stents inserted (n,%)** | 0.428 | 0.32 | 1.793 | 1.535 | 0.820–2.874 | 0.181 |
| 1 piece |  |  |  |  |  |  |
| ≥2 piece |  |  |  |  |  |  |
| **Stent length (mm)** | 0.046 | 0.016 | 7.904 | 1.047 | 1.014–1.081 | 0.005a |
| **Stent diameter(mm)** | 0.451 | 0.126 | 12.843 | 1.57 | 1.227–2.009 | <0.001a |
| **Discharge medication (n,%)** |  |  |  |  |  |  |
| Aspirin | 0.414 | 0.714 | 0.335 | 1.512 | 0.373–6.134 | 0.563 |
| P2Y12 receptor inhibitors | 1.178 | 0.511 | 5.319 | 3.247 | 1.193–8.836 | 0.021a |
| β-blockers | -0.94 | 0.369 | 6.484 | 0.391 | 0.190–0.805 | 0.011a |
| ACEIs or ARBs | -0.291 | 0.203 | 2.057 | 0.748 | 0.503–1.112 | 0.152 |
| Statins | -0.292 | 0.714 | 0.167 | 0.747 | 0.184–3.029 | 0.683 |
| Diuretics | -0.021 | 0.215 | 0.01 | 0.979 | 0.642–1.494 | 0.922 |
| Insulin treatment | 0.941 | 0.714 | 1.733 | 2.562 | 0.631–10.390 | 0.188 |
| **Blood tests** |  |  |  |  |  |  |
| Hb(g/L) | 0.006 | 0.005 | 1.272 | 1.006 | 0.996–1.015 | 0.259 |
| eGFR (ml/min/1.73m2) | 0.01 | 0.004 | 6.082 | 1.01 | 1.002–1.019 | 0.014a |
| Scr (μmol/L) | -0.009 | 0.005 | 3.289 | 0.991 | 0.982–1.001 | 0.07 |
| UA (μmol/L) | 0.001 | 0.001 | 0.826 | 1.001 | 0.999–1.002 | 0.364 |
| AST (U/L) | -0.001 | 0.002 | 0.097 | 0.999 | 0.996–1.003 | 0.755 |
| ALT(U/L) | -0.001 | 0.002 | 0.234 | 0.999 | 0.994–1.004 | 0.629 |
| ALB(g/L) | 0.003 | 0.007 | 0.191 | 1.003 | 0.989–1.017 | 0.662 |
| HbA1c(%) | 0.05 | 0.071 | 0.497 | 1.051 | 0.915–1.209 | 0.481 |
| FPG (mmol/L) | 0.042 | 0.033 | 1.641 | 1.043 | 0.978–1.112 | 0.2 |
| LDL-C(mmol/L) | 0.07 | 0.06 | 1.378 | 1.073 | 0.954–1.206 | 0.24 |
| HDL-C(mmol/L) | 0.843 | 0.329 | 6.58 | 2.323 | 1.220–4.425 | 0.01a |
| TG (mmol/L) | -0.43 | 0.112 | 14.787 | 0.651 | 0.523–0.810 | <0.001a |
| TC (mmol/L) | -0.176 | 0.044 | 16.312 | 0.839 | 0.770–0.913 | <0.001a |
| Lp(a)(mg/L) | -0.002 | 0 | 11.54 | 0.998 | 0.997–0.999 | 0.001a |
| hs-TnT (ng/L) | 0 | 0 | 17.576 | 1 | 1.000–1.000 | <0.001a |
| NT-proBNP (pg/ml) | 0 | 0 | 18.781 | 1 | 1.000–1.000 | <0.001a |
| cTnI (ng/ml) | -0.067 | 0.017 | 15.113 | 0.936 | 0.905–0.968 | <0.001a |
| CK-MB (ng/ml) | -0.002 | 0.001 | 6.454 | 0.998 | 0.996–1.000 | 0.011a |
| SII (24h before PPCI) | 0 | 0 | 3.533 | 1 | 1.000–1.000 | 0.06 |
| SII(24h after PPCI) | 0 | 0 | 1.287 | 1 | 1.000–1.000 | 0.257 |
| SII (48h after PPCI) | 0 | 0 | 6.811 | 1 | 1.000–1.001 | 0.009a |
| SII( before discharge) | 0.001 | 0 | 15.288 | 1.001 | 1.000–1.001 | <0.001a |
| SII (1 month after discharge) | 0.001 | 0 | 45.26 | 1.001 | 1.001–1.001 | <0.001a |
| LDL-C(1 month after discharge) | 0.8 | 0.092 | 75.197 | 2.226 | 1.858–2.668 | <0.001a |

**Notes:**a is significant.

**Abbreviations:**HR, heart rate; SBP, systolic blood pressure; DBP, diastolic blood pressure; TIA, transient ischaemic attack; MI, myocardial infarction; PPCI, primary percutaneous coronary intervention; CABG, coronary artery bypass grafting; ACEIs, angiotensin-converting enzyme inhibitors; ARBs, angiotensin receptor blockers; CCBs, calcium channel blockers; LM, left main; LAD, left anterior descending artery; LCX, left circumflex artery; RCA, right coronary artery.Hb, haemoglobin; eGFR, estimated glomerular filtration rate; Scr, serum creatinine; UA, uric acid; AST, aspartate aminotransferase; ALT, alanine aminotransferase; ALB, albumin; HbA1c, glycated haemoglobin; FPG, fasting plasma glucose; HDL-C, high-density lipoprotein cholesterol; TG, triglycerides; TC, total cholesterol; Lp(a), lipoprotein (a); hs-TnT, high-sensitivity troponin T; NT-proBNP, N-terminal pro-B-type natriuretic peptide; cTnI, cardiac troponin I; CK-MB, creatine kinase-MB; SII, systemic immune-inflammation index; LDL-C, low-density lipoprotein cholesterol.

**Supplementary Table S2. Variables and Coefficients Selected by LASSO Cox Regression in the Late Window (t > 7 months).**

| **Variables** | **coefficient(MPLD)** | **coefficient(1-SE)** |
| --- | --- | --- |
| TG | -0.035328829 | -0.006026071 |
| hs-TnT | 0.000048169 | 0.000027626 |
| NT-proBNP | 0.000065267 | 0.000005376 |
| LDL-C(1 month after discharge) | 0.000595412 | 0.000433935 |
| SII (1 month after discharge) | 0.629007777 | 0.559971792 |
| cTnI | -0.000709665 |  |
| Stent diameter | 0.081980779 |  |
| Discharge medication（P2Y12 receptor inhibitors） | -0.014178495 |  |

**Notes:** The model was built using data from the late window (t > 7 months) with variable selection performed by 10-fold cross-validation. Two sets of coefficients are presented: 1) the model achieving the minimum partial likelihood deviance (MPLD) and 2) the most parsimonious model within 1 standard error (1-SE) of the MPLD (the 1-SE criterion). Blank cells indicate that the variable was not selected into the corresponding model.

**Abbreviations:** TG, triglycerides; hs-TnT, high-sensitivity troponin-T; NT-proBNP, N-terminal pro–B-type natriuretic peptide; LDL-C, low-density lipoprotein cholesterol; SII, systemic immune-inflammation index; cTnI, cardiac troponin I; SE, standard error; LASSO, least absolute shrinkage and selection operator.

**Supplementary Table S3. Multivariable Cox Model for the Primary Endpoint.**

| **Variables** | **HR** | **95%CI** | ***P*** |
| --- | --- | --- | --- |
| TG | 0.683 | 0.554–0.843 | < 0.001 |
| hs-TnT | 1.000 | 1.000–1.000 | 0.899 |
| NT-proBNP | 1.000 | 1.000–1.000 | 0.202 |
| LDL-C(1 month after discharge) | 1.802 | 1.481–2.193 | < 0.001 |
| SII (1 month after discharge) | 1.001 | 1.000–1.001 | < 0.001 |

**Notes:** This multivariable Cox proportional hazards model was constructed with predictors pre-selected by LASSO regression in the late window (t > 7 months).

**Abbreviations:** TG, triglycerides; hs-TnT, high-sensitivity troponin T; NT-proBNP, N-terminal pro–B-type natriuretic peptide; LDL-C, low-density lipoprotein cholesterol; SII, systemic immune-inflammation index; HR, hazard ratio; CI, confidence interval.

**Supplementary Table S4. Schoenfeld Residual Tests for Proportional Hazards (Baseline Cox Model).**

| **Variables** | **χ²** | ***P*** |
| --- | --- | --- |
| TG | 0.01 | 0.92 |
| hs-TnT | 3.775 | 0.052 |
| NT-proBNP | 2.374 | 0.123 |
| SII (1 month after discharge) | 2.333 | 0.127 |
| LDL-C(1 month after discharge) | 8.946 | 0.003 |
| GLOBAL | 12.864 | 0.025 |

**Notes:** Baseline Cox model without time-dependent terms. Tests use scaled Schoenfeld residuals (cox.zph) and report χ² and *P* values (df = 1 for individual covariates; df = k for the global test). *P* < 0.05 indicates departure from the proportional hazards assumption.

**Abbreviations:** PH, proportional hazards; TG, triglycerides; hs-TnT, high-sensitivity troponin T; NT-proBNP, N-terminal pro–B-type natriuretic peptide; LDL-C, low-density lipoprotein cholesterol.

**Supplementary Table S5. Event Rates of Primary Endpoint Across Groups Stratified by Dual Target Attainment Status of LDL-C and SII.**

| **Group** | **n** | **Number of events** | **Event rate(%)** |
| --- | --- | --- | --- |
| Group1 | 122 | 2 | 1.6 |
| Group2 | 182 | 18 | 9.9 |
| Group3 | 69 | 14 | 20.3 |
| Group4 | 114 | 64 | 56.1 |

**Notes:** n indicates the number of patients at risk. “Number of events” refers to the count of primary outcome events, and “Event rate (%)” was calculated as 100 × (events / n).Group definitions: Group 1, both on-target; Group 2, SII on-target only; Group 3, LDL-C on-target only; Group 4, both off-target. Rates are crude.

**Abbreviations:** SII, systemic immune–inflammation index; LDL-C, low-density lipoprotein cholesterol.

### Supplementary Table S6. Schoenfeld Residual Tests for Proportional Hazards (Adjusted Interaction Model).

| **Variables** | **χ²** | **df** | ***P*** |
| --- | --- | --- | --- |
| TG | 0.011 | 1 | 0.918 |
| hs-TnT | 2.654 | 1 | 0.103 |
| NT-proBNP | 1.868 | 1 | 0.172 |
| SII | 2.431 | 1 | 0.119 |
| LDL-C | 0.124 | 1 | 0.725 |
| SII×LDL-C | 0.188 | 1 | 0.664 |
| GLOBAL | 11.382 | 6 | 0.077 |

****Notes:** Cox model including SII, LDL-C, and their interaction (SII×LDL-C), adjusted for TG, hs-TnT, and NT-proBNP; no time-dependent terms. *P* < 0.05 indicates departure from the proportional hazards assumption.**

****Abbreviations:** PH, proportional hazards; TG, triglycerides; hs-TnT, high-sensitivity troponin T; NT-proBNP, N-terminal pro–B-type natriuretic peptide; SII, systemic immune-inflammation index; LDL-C, low-density lipoprotein cholesterol.**

**Supplementary Table S7. Adjusted Cox Model of SII–LDL-C Interaction Effects According to SII and LDL-C Target Attainment Status.**

| **Variables** | **aHR (95% CI)** | ***P*** |
| --- | --- | --- |
| Adjusted effects |  |  |
| SII (not at target vs at target) | 18.3 (4.14–80.6) | ＜0.001 |
| LDL-C (not at target vs at target) | 7.19 (1.67–31.0) | 0.008 |
| SII × LDL-C (interaction) | 0.527 (0.109–2.54) | 0.425 |
| Adjusted Covariates |  |  |
| TG (per unit) | 0.638 (0.520–0.784) | ＜0.001 |
| hs-TnT (per unit) | 1.000 (1.000–1.000) | 0.736 |
| NT-proBNP (per unit) | 1.000 (1.000–1.000) | 0.939 |

**Notes:**Adjusted HRs and 95% CIs are derived from a multivariable Cox proportional hazards model. The model included the main effects of SII and LDL-C target status, their multiplicative interaction term, and adjusted for covariates (TG, hs-TnT, and NT-proBNP).

****Abbreviations:**TG, triglycerides; hs-TnT, high-sensitivity troponin T; NT-proBNP, N-terminal pro–B-type natriuretic peptide; SII, systemic immune-inflammation index; LDL-C, low-density lipoprotein cholesterol; aHR, adjusted Hazard Ratio.**

**Supplementary Table S8. Twelve-Month Absolute Risks and ICR According to SII and LDL-C Target Attainment Status.**

| Measure | Definition | Estimate | 95% CI |
| --- | --- | --- | --- |
| Both on-target | R₀₀ | 14.30% | reference |
| LDL on-target only | R₁₀ | 69.70% | 42.7–75.9 |
| SII on-target only | R₀₁ | 55.80% | 22.6–72.6 |
| Both off-target | R₁₁ | 75.30% | 69.0–80.3 |
| ICR(pp) | Interaction Contrast | -36.0 | -54.1–18.2 |

**Notes:** Estimates are from an adjusted Cox proportional hazards model using the Breslow baseline hazard (covariates: TG, hs-TnT, NT-proBNP). Group definitions: R00 = both on-target; R10 = LDL-C on-target only; R01 = SII on-target only; R11 = both off-target. The interaction contrast on the absolute (risk-difference) scale is calculated as ICR = R11 − R10 − R01 + R00 and is reported in percentage points (pp). A negative ICR indicates sub-additivity; a 95% confidence interval crossing 0 indicates no statistical evidence of supra-additivity. "Reference" denotes the dual-attainment baseline group. The confidence interval is omitted for this entry as it represents the model-based mean risk for the reference scenario. The ICR is interpreted on the absolute risk-difference scale.

**Abbreviations:** TG, triglycerides; hs-TnT, high-sensitivity troponin T; NT-proBNP, N-terminal pro-B-type natriuretic peptide; LDL-C, low-density lipoprotein cholesterol; SII, systemic immune-inflammation index; ICR, interaction contrast ratio; CI, confidence interval.

**Supplementary Table S9. Comparison of Clinical and Biochemical Characteristics According to SII and LDL-C Target Attainment Status.**

| **Variables** | **Group1 (n=122)** | **Group2 (n=182)** | **Group3 (n=69)** | **Group4 (n=114)** | ***P*** |
| --- | --- | --- | --- | --- | --- |
| **Age (years)** | 62.02 ± 16.34 | 63.41 ± 15.40 | 62.20 ± 15.91 | 64.40 ± 14.13 | 0.633 |
| **Gender (n,%)** |  |  |  |  | 0.833 |
| Male | 30 (24.59) | 45 (24.73) | 27 (39.13) | 33 (28.95) |  |
| Female | 92 (75.41) | 137 (75.27) | 42 (60.87) | 81 (71.05) |  |
| **Hospitalization day(d)** | 7.00 (5.00, 8.00) | 7.00 (5.00, 8.50) | 7.00 (5.00, 9.00) | 6.00 (5.00, 8.38) | 0.63 |
| **HR (beats-per-minute)** | 78.00 (69.25, 88.75) | 78.00 (68.25, 85.00) | 78.00 (70.00, 90.00) | 81.00 (70.25, 90.00) | 0.29 |
| **SBP (mmHg)** | 117.00 (110.00, 141.00) | 120.00 (111.00, 147.00) | 124.00 (114.00, 140.00) | 121.00 (111.00, 141.75) | 0.452 |
| **DBP (mmHg)** | 78.00 (69.00, 85.75) | 81.00 (71.00, 90.00) | 81.00 (71.00, 91.00) | 80.00 (70.00, 89.75) | 0.086 |
| **Medical history (n,%)** |  |  |  |  |  |
| Hypertension | 62 (50.82) | 82 (45.05) | 28 (40.58) | 49 (42.98) | 0.142 |
| Diabetes mellitus | 38 (31.15) | 38 (20.88) | 11 (15.94) | 13 (11.40) | 0.046a |
| Stroke or TIA | 11 (9.02) | 28 (15.38) | 10 (14.49) | 10 (8.77) | 0.091 |
| Previous MI/PCI/CABG | 12 (9.84) | 18 (9.89) | 8 (11.59) | 12 (10.53) | 0.059 |
| Heart failure | 5 (4.10) | 5 (2.75) | 1 (1.45) | 3 (2.63) | 0.559 |
| Coronary heart disease | 12 (9.84) | 16 (8.79) | 8 (11.59) | 12 (10.53) | 0.803 |
| **Current smoking status** | 39 (31.97) | 70 (38.46) | 23 (33.33) | 44 (38.60) | 0.121 |
| **Current drinking status** | 24 (19.67) | 29 (15.93) | 13 (18.84) | 26 (22.81) | 0.473 |
| **Medications during hospitalisation (n,%)** | | | | | |
| Aspirin | 122(100) | 182(100) | 69(100) | - | - |
| P2Y12 receptor inhibitors | 122(100) | 182(100) | 69(100) | - | - |
| ACEIs or ARBs | 59 (48.36) | 108 (59.34) | 36 (52.17) | 69 (60.53) | 0.154 |
| CCBs | 53 (43.44) | 98 (53.85) | 33 (47.83) | 70 (61.40) | 0.002a |
| Statins | 122(100) | 182(100) | 69(100) |  |  |
| β-blockers | 101 (82.79) | 160 (87.91) | 63 (91.30) | 107 (93.86) | 0.062 |
| Diuretics | 62 (50.82) | 88 (48.35) | 33 (47.83) | 46 (40.35) | 0.168 |
| **Killip class (n,%)** |  |  |  |  | 0.825 |
| Killip class (1-2) | 10 (8.20) | 12 (6.59) | 9 (13.04) | 11 (9.65) |  |
| Killip class (3-4) | 112 (91.80) | 170 (93.41) | 60 (86.96) | 103 (90.35) |  |
| **Target Vessel (n,%)** |  |  |  |  |  |
| LM | 2 (1.64) | 8 (4.40) | 4 (5.80) | 3 (2.63) | 0.382 |
| LAD | 56 (45.90) | 95 (52.20) | 43 (62.32) | 75 (65.79) | 0.001a |
| LCX | 29 (23.77) | 33 (18.13) | 14 (20.29) | 14 (12.28) | 0.001a |
| RCA | 41 (33.61) | 48 (26.37) | 13 (18.84) | 26 (22.81) | 0.083 |
| **Simultaneous treatment of vascular situations (n,%)** | | | | | 0.083 |
| 1 | 117 (95.90) | 177 (97.25) | 63 (91.30) | 111 (97.37) |  |
| >1 | 5 (4.10) | 5 (2.75) | 6 (8.70) | 3 (2.63) |  |
| **Vessel-disease (stenosis >50%) (n,%)** |  |  |  |  | 0.016a |
| 1 | 37 (30.33) | 70 (38.46) | 27 (39.13) | 53 (46.49) |  |
| >1 | 85 (69.67) | 112 (61.54) | 42 (60.87) | 61 (53.51) |  |
| **IVUS assit (n,%)** |  |  |  |  | 0.559 |
| Yes | 116 (95.08) | 174 (95.60) | 66 (95.65) | 111 (97.37) |  |
| No | 6 (4.92) | 8 (4.40) | 3 (4.35) | 3 (2.63) |  |
| **Number of stents inserted (n,%)** |  |  |  |  | 0.181 |
| 1 piece | 101 (82.79) | 156 (85.71) | 56 (81.16) | 98 (85.96) |  |
| ≥2 piece | 21 (17.21) | 26 (14.29) | 13 (18.84) | 16 (14.04) |  |
| **Stent length (mm)** | 20.00 (16.00, 23.25) | 20.00 (15.25, 24.00) | 22.00 (18.00, 27.00) | 21.50 (18.00, 28.00) | 0.001a |
| **Stent diameter(mm)** | 1.77 (1.21, 2.70) | 2.10 (1.50, 2.50) | 2.50 (1.50, 2.75) | 2.75 (2.00, 3.00) | 0.001a |
| **Discharge medication (n,%)** |  |  |  |  |  |
| Aspirin | 122(100) | 179 (98.35) | 66 (95.65) | 113 (99.12) | 0.574 |
| P2Y12 receptor inhibitors | 121 (99.18) | 181 (99.45) | 66 (95.65) | 112 (98.25) | 0.014a |
| β-blockers | 97 (79.51) | 150 (82.42) | 56 (81.16) | 98 (85.96) | 0.006a |
| ACEIs or ARBs | 38 (31.15) | 87 (47.80) | 19 (27.54) | 49 (42.98) | 0.154 |
| Statins | 120 (98.36) | 177 (97.25) | 65 (94.20) | 112 (98.25) | 0.666 |
| Diuretics | 46 (37.70) | 51 (28.02) | 27 (39.13) | 34 (29.82) | 0.96 |
| Insulin treatment | 4 (3.28) | 12 (6.59) | 4 (5.80) | 3 (2.63) | 0.193 |
| **Blood tests** |  |  |  |  |  |
| Hb(g/L) | 121.00 (115.00, 145.00) | 122.00 (116.00, 143.50) | 125.00 (115.00, 144.00) | 133.50 (116.50, 148.00) | 0.236 |
| eGFR (ml/min/1.73m2) | 102.66 (84.91, 120.00) | 100.08 (80.62, 116.11) | 103.54 (88.44, 119.42) | 102.28 (79.45, 120.00) | 0.811 |
| Scr (μmol/L) | 61.00 (54.00, 72.00) | 62.00 (51.00, 75.00) | 59.00 (54.00, 71.00) | 59.00 (51.00, 72.75) | 0.53 |
| UA (μmol/L) | 214.00 (159.25, 270.25) | 224.50 (168.00, 291.75) | 254.00 (185.00, 291.00) | 258.00 (201.75, 330.25) | 0.029a |
| AST(U/L) | 109.50 (66.75, 149.75) | 113.50 (71.25, 154.00) | 91.00 (69.00, 129.00) | 113.00 (61.75, 154.00) | 0.374 |
| ALT(U/L) | 47.50 (21.00, 66.25) | 50.00 (24.00, 74.75) | 49.00 (28.00, 67.00) | 48.50 (32.25, 69.75) | 0.925 |
| ALB(g/L) | 18.95 (14.95, 40.77) | 22.04 (16.47, 41.92) | 31.40 (17.50, 40.80) | 36.05 (19.13, 41.10) | 0.004a |
| HbA1c(%) | 6.10 (5.80, 7.47) | 6.00 (5.70, 6.70) | 6.00 (5.70, 6.80) | 6.00 (5.60, 6.57) | 0.111 |
| FPG (mmol/L) | 6.10 (5.15, 8.19) | 5.68 (4.85, 7.09) | 6.42 (5.47, 7.45) | 5.78 (4.97, 7.60) | 0.225 |
| LDL-C(mmol/L) | 1.87 (1.21, 2.51) | 1.99 (1.25, 2.62) | 2.54 (1.67, 4.17) | 2.04 (1.35, 2.70) | <0.001a |
| HDL-C(mmol/L) | 0.98 (0.84, 1.11) | 1.02 (0.85, 1.16) | 1.08 (0.89, 1.33) | 1.07 (0.88, 1.23) | 0.005a |
| TG (mmol/L) | 1.48 (1.07, 2.75) | 1.61 (1.03, 10.26) | 1.69 (1.09, 10.52) | 1.34 (0.92, 7.53) | 0.313 |
| TC (mmol/L) | 4.66 (2.13, 6.20) | 4.62 (2.88, 5.95) | 4.85 (3.54, 5.86) | 4.47 (3.32, 5.79) | 0.974 |
| Lp(a)(mg/L) | 248.50 (153.00, 514.75) | 218.00 (147.75, 520.00) | 267.00 (161.00, 565.00) | 228.50 (149.25, 471.00) | 0.725 |
| hs-TnT (ng/L) | 1198.50 (229.92, 3740.00) | 1183.50 (260.35, 4191.75) | 1431.00 (180.20, 4460.00) | 1427.00 (255.18, 5052.25) | 0.743 |
| NT-proBNP (pg/ml) | 719.07 (224.53, 1269.00) | 809.50 (231.12, 1448.50) | 1082.00 (215.70, 2111.00) | 1079.50 (505.75, 1829.25) | 0.011a |
| cTnI (ng/ml) | 5.19 (1.57, 11.23) | 5.54 (1.86, 11.88) | 8.32 (2.54, 13.87) | 5.96 (2.48, 12.73) | 0.069 |
|  |  |  |  |  |  |
| CK-MB (ng/ml) | 120.50 (79.25, 207.25) | 125.50 (75.00, 217.00) | 114.00 (89.00, 226.00) | 170.50 (102.00, 283.50) | 0.494 |
| SII (24h before PPCI) | 716.30 (474.22, 1123.80) | 787.90 (473.42, 1158.98) | 1057.40 (712.70, 1626.10) | 1126.20 (748.93, 1758.98) | <0.001a |
| SII(24h after PPCI) | 755.42 (547.46, 984.35) | 834.59 (607.16, 1089.10) | 1165.29 (918.91, 1488.28) | 1130.50 (882.08, 1590.46) | <0.001a |
| SII (48h after PPCI) | 590.64 (477.96, 873.20) | 678.98 (472.41, 864.98) | 1044.06 (780.00, 1224.11) | 951.05 (700.57, 1370.06) | <0.001a |
| SII( before discharge) | 550.63 (419.79, 815.16) | 582.19 (461.65, 791.42) | 890.24 (802.10, 1150.90) | 935.65 (680.22, 1168.89) | <0.001a |
| SII (1 month after discharge) | 464.60 (260.24, 567.35) | 499.16 (284.91, 587.34) | 831.69 (758.94, 971.64) | 847.79 (723.52, 994.42) | <0.001a |
| LDL-C(1 month after discharge) | 1.15 (1.08, 1.26) | 1.87 (1.62, 2.35) | 1.20 (1.12, 1.41) | 1.98 (1.65, 2.46) | <0.001a |

**Notes:** Data are presented as the IQR, mean ± SD or n (%). a is signifcant.Group definitions: Group 1, both on-target; Group 2, SII on-target only; Group 3, LDL-C on-target only; Group 4, both off-target.

**Abbreviations:**HR, heart rate; SBP, systolic blood pressure; DBP, diastolic blood pressure; TIA, transient ischaemic attack; MI, myocardial infarction; PPCI, primary percutaneous coronary intervention; CABG, coronary artery bypass grafting; ACEIs, angiotensin-converting enzyme inhibitors; ARBs, angiotensin receptor blockers; CCBs, calcium channel blockers; LM, left main; LAD, left anterior descending artery; LCX, left circumflex artery; RCA, right coronary artery.Hb, haemoglobin; eGFR, estimated glomerular filtration rate; Scr, serum creatinine; UA, uric acid; AST, aspartate aminotransferase; ALT, alanine aminotransferase; ALB, albumin; HbA1c, glycated haemoglobin; FPG, fasting plasma glucose; HDL-C, high-density lipoprotein cholesterol; TG, triglycerides; TC, total cholesterol; Lp(a), lipoprotein (a); hs-TnT, high-sensitivity troponin T; NT-proBNP, N-terminal pro-B-type natriuretic peptide; cTnI, cardiac troponin I; CK-MB, creatine kinase-MB; SII, systemic immune-inflammation index; LDL-C, low-density lipoprotein cholesterol.

**
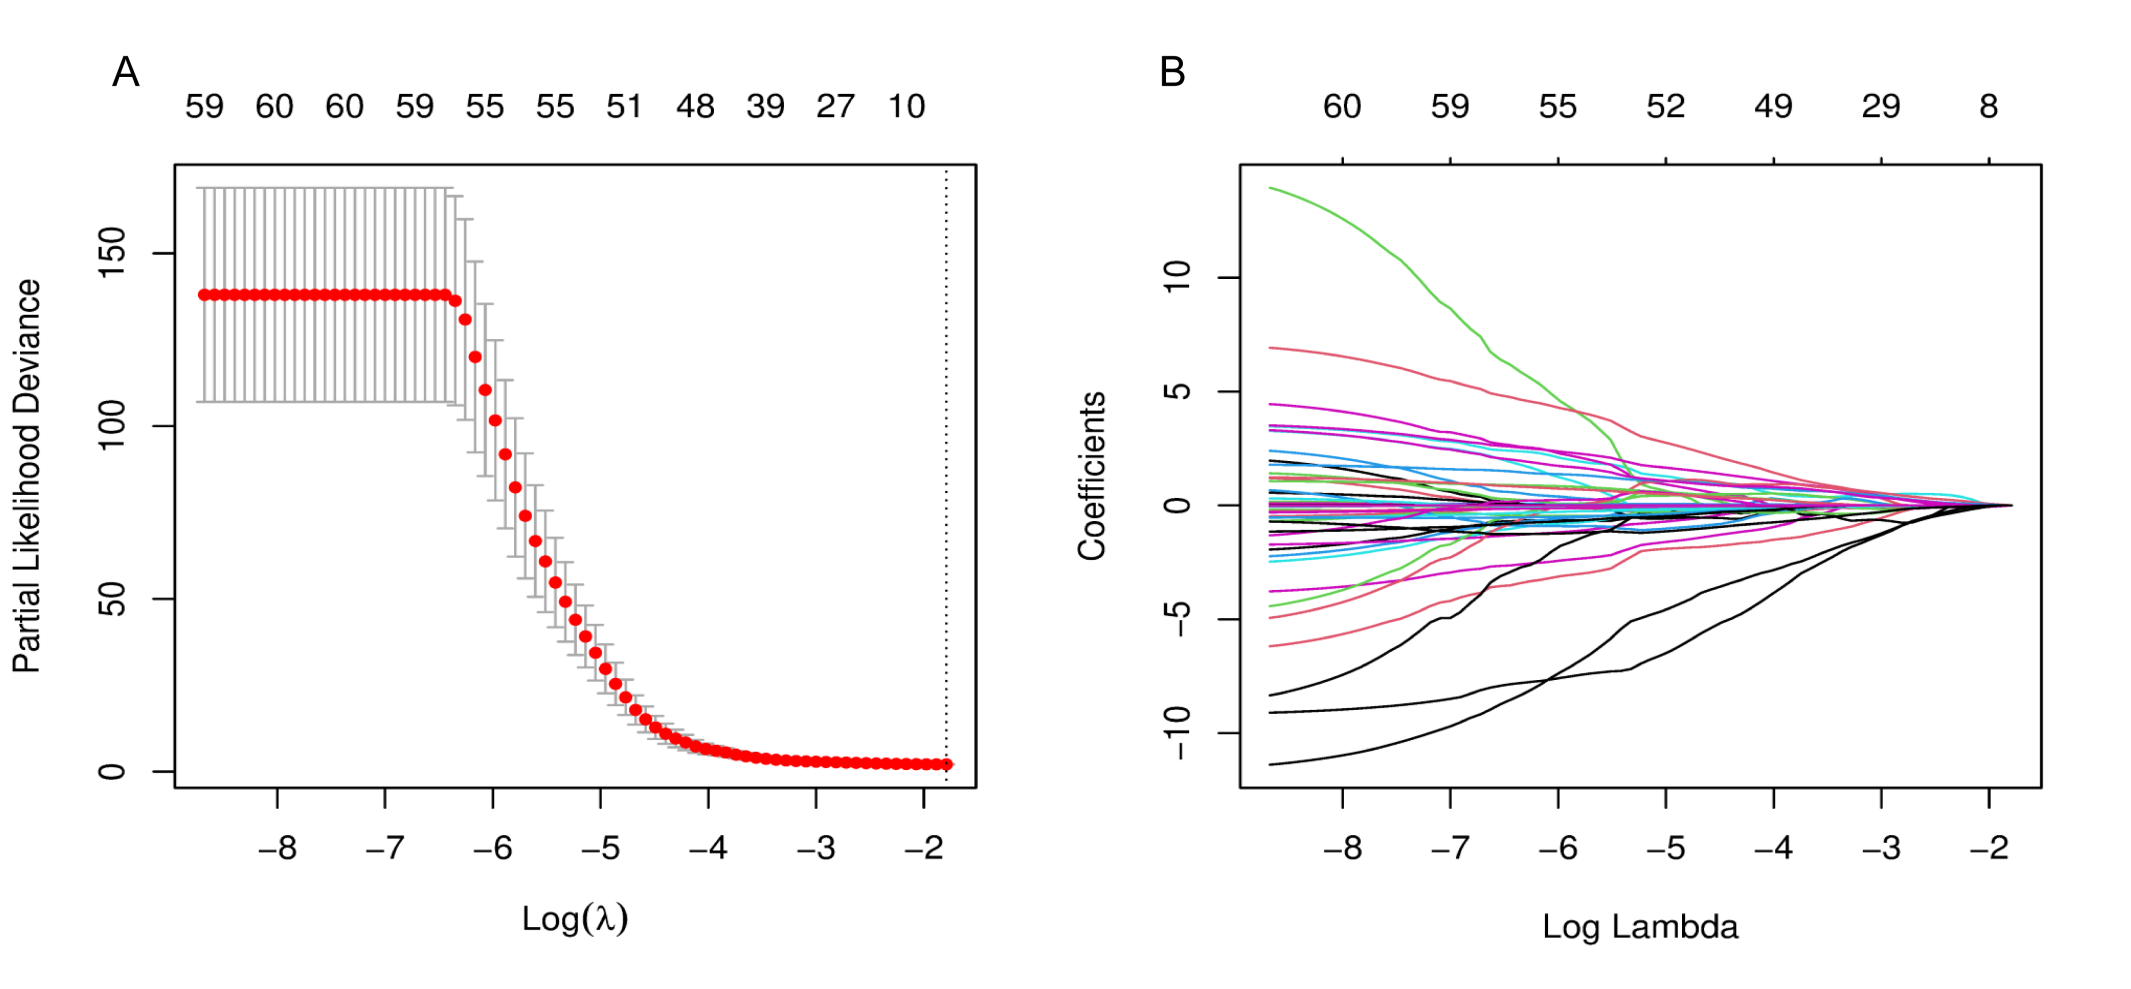
**

**Supplementary Figure S1. Variable Selection with Time-Segmented LASSO-Cox Regression in the Early Window (t ≤ 7 Months).
Notes:** (A) Ten-fold cross-validated partial-likelihood deviance versus log(λ). Red dots indicate the mean deviance; gray bars, ±1 SE. Vertical dotted lines mark λ_min and λ_1-SE. Numbers above the curve indicate the number of non-zero coefficients at each λ. (B) Coefficient paths for candidate predictors as a function of log(λ); coefficients shrink toward zero as the penalty increases.
**Abbreviations:** λ, penalty parameter; SE, standard error.


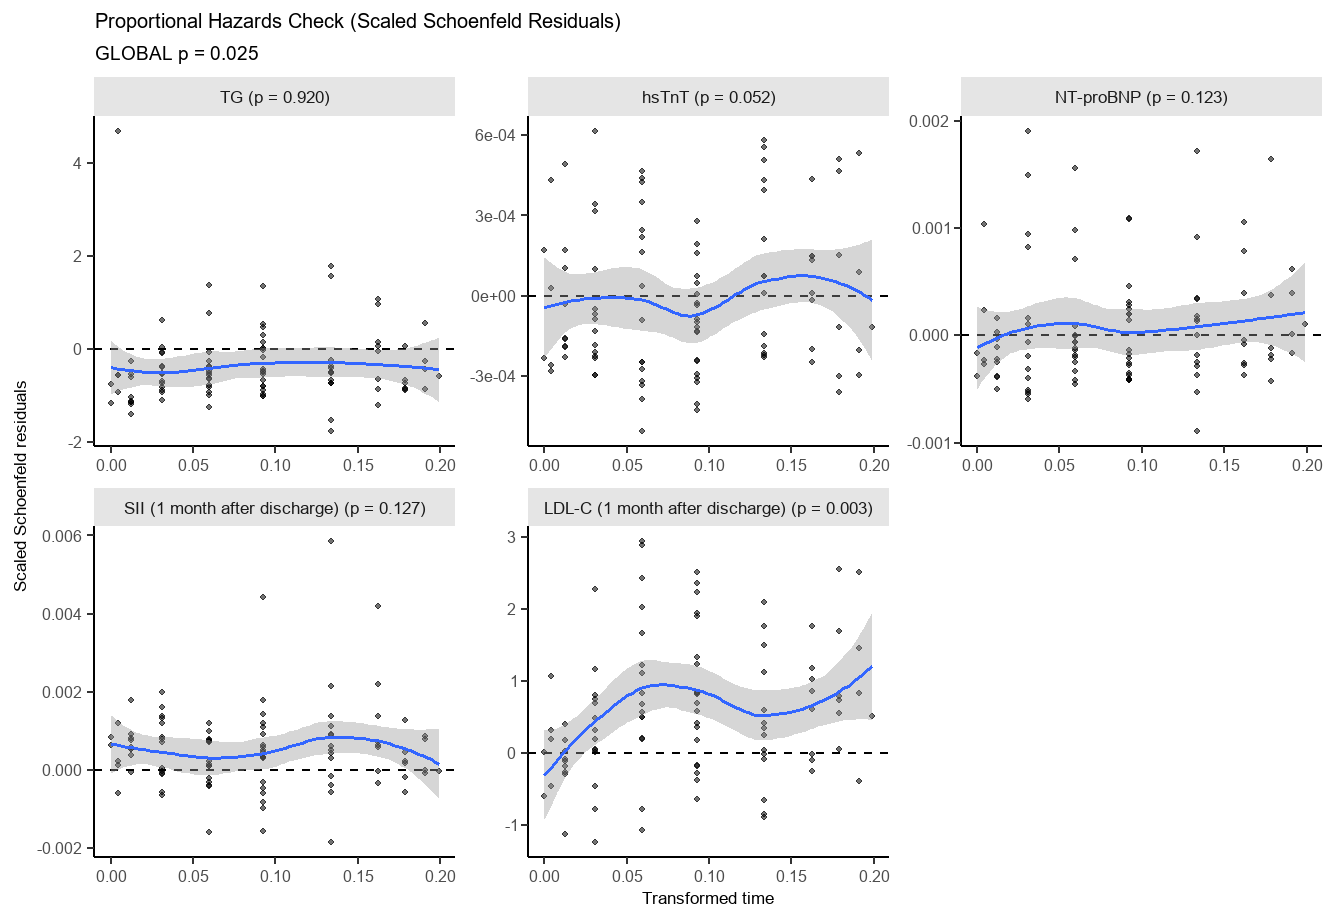


**Supplementary Figure S2. Proportional-Hazards Diagnostics with Scaled Schoenfeld Residuals (Overall Cohort).
Notes:** For each LASSO-selected covariate, scaled Schoenfeld residuals are plotted against transformed time (points) with a LOESS smoother (solid line) and 95% CI (shaded band); the horizontal dashed line denotes the zero slope expected under the PH assumption. The global PH test is shown in the header.
**Abbreviations:** PH, proportional hazards; TG, triglycerides; hs-TnT, high-sensitivity troponin-T; NT-proBNP, N-terminal pro-B-type natriuretic peptide; SII, systemic immune-inflammation index; LDL-C, low-density lipoprotein cholesterol.


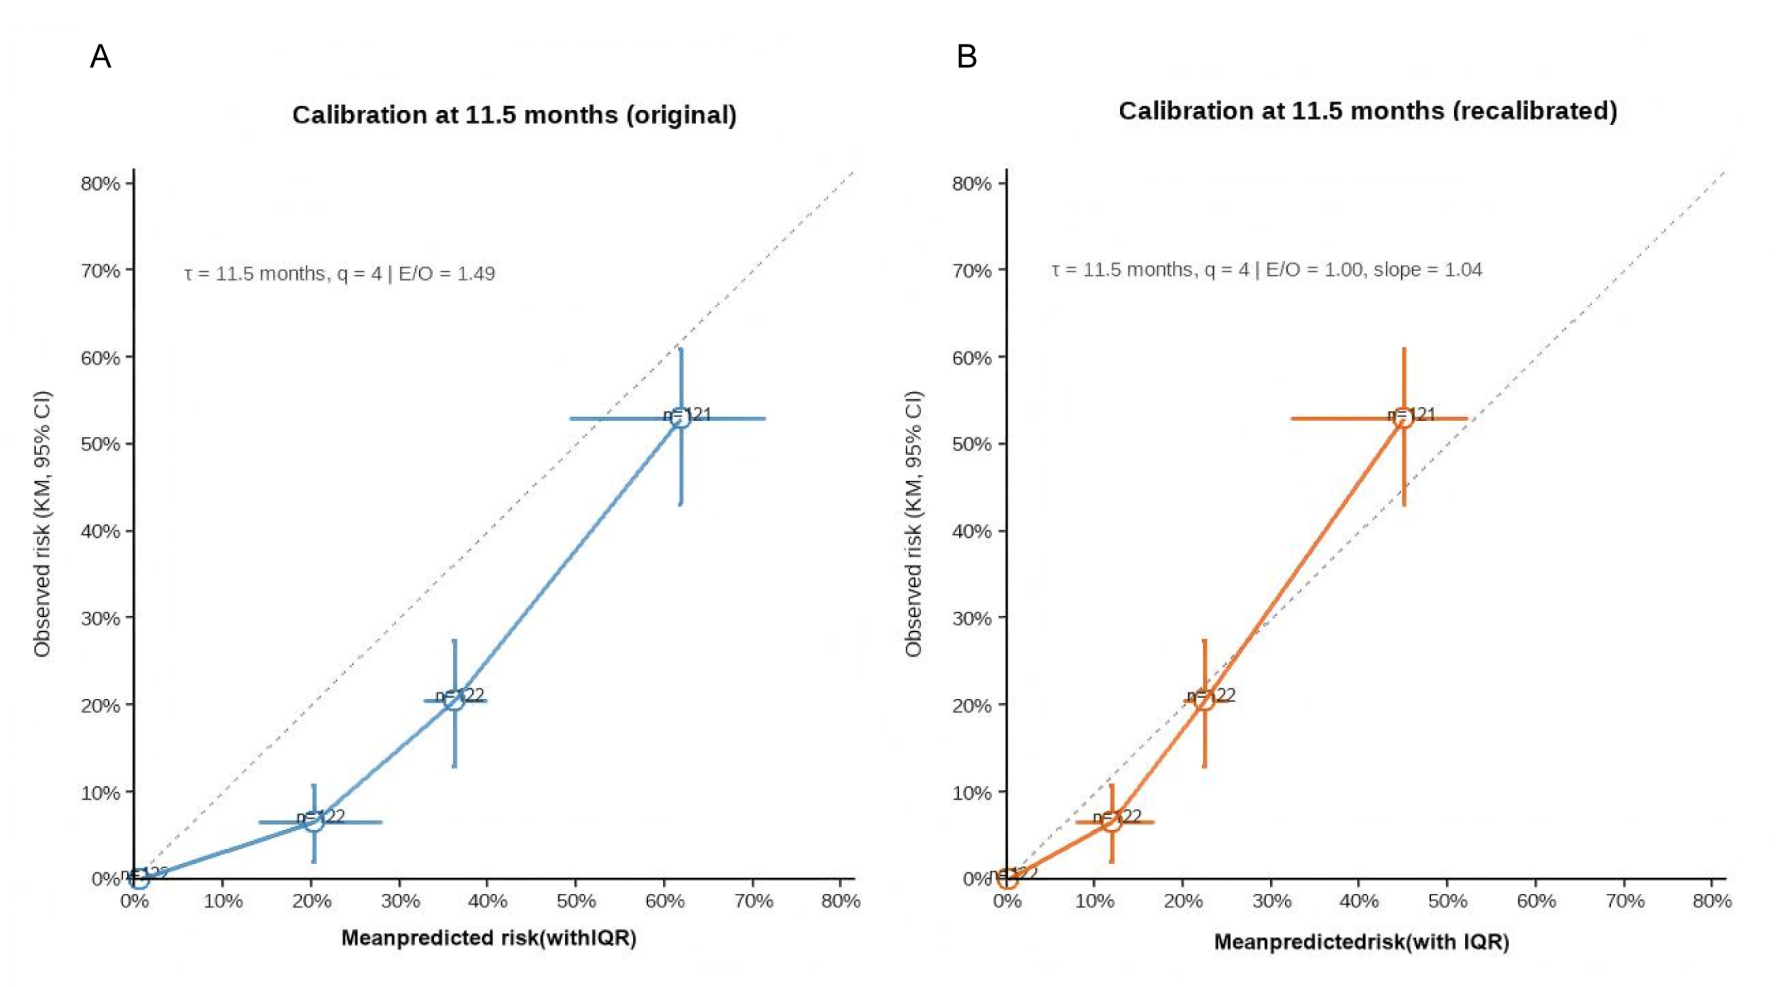


**Supplementary Figure S3. Internal Validation and Calibration at τ = 11.5 Months.**

**Notes:** (A) Original calibration: mean predicted risk vs. KM observed risk across four risk groups (points with 95% CIs); dashed line = ideal. (B) After linear recalibration (intercept and slope adjusted). Bootstrap resampling used for internal validation (B = 300). Event times truncated at 11.50 months; administrative censoring at 12.00 months.
**Abbreviations:** τ, evaluation time horizon; B, bootstrap resamples; KM, Kaplan–Meier; CI, confidence interval; IQR, interquartile range.
